# Supplementary material for: Nutritional risk factors for all-cause mortality of critically ill patients: a retrospective cohort study
Source: PubMed Central journal article supplement — BMJ Open. 2022 Nov 16;12(11):e066015. doi: 10.1136/bmjopen-2022-066015 (PMC9677028; doi:10.1136/bmjopen-2022-066015), 2022-11-16
Supplement: bmjopen-2022-066015supp001.pdf [file bmjopen-2022-066015supp001.pdf]

## Supplementary appendix

### Table of contents

**1. Title****2. List of investigators****3. Text****4. Figures****1. Title:**

**Nutritional risk factors for all -cause mortality of critically ill patients: a retrospective cohort study**

**2. List of investigators:**

Jine Wang<sup>1</sup>, Nan Zheng<sup>2</sup>, Xinyi Chang<sup>2</sup>, Huitao Qian<sup>2</sup> and Yi Han<sup>1\*</sup>

**3. Text:**

**Predictive values of prealbumin (PA) -based composite indicators for 28-day outcome**

We also analyzed the predictive values of PA-based composite indicators for patients' 28-day outcome. Results showed that PA + transferrin, PA + urea, PA + serum creatinine, PA + AST, and PA + RBP had certain predictive values of critically ill patients with enteral nutrition. The AUROC results were 0.64, 0.65, 0.67, 0.64 and 0.65 respectively, and all P values were < 0.01 (Figure S1).

## 4. Figure

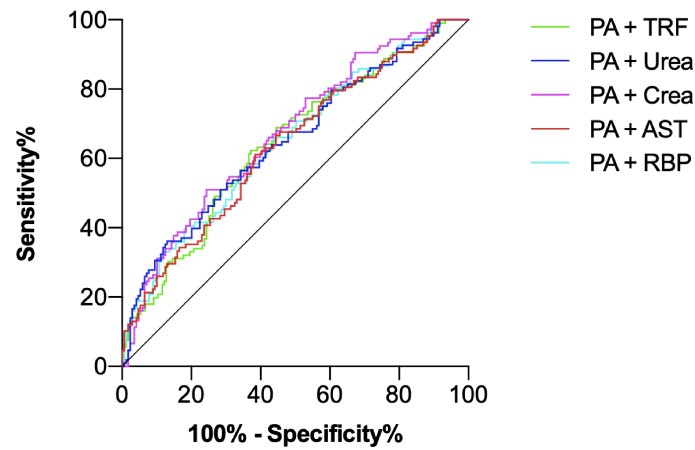

| Variable     | PA<br>+ TRF | PA<br>+ Urea | PA<br>+ Crea | PA<br>+ AST | PA<br>+ RBP |
|--------------|-------------|--------------|--------------|-------------|-------------|
| Area         | 0.64        | 0.65         | 0.67         | 0.64        | 0.65        |
| Std. Error   | 0.03        | 0.03         | 0.03         | 0.03        | 0.03        |
| Lower 95% CI | 0.58        | 0.58         | 0.61         | 0.57        | 0.58        |
| Upper 95% CI | 0.71        | 0.72         | 0.74         | 0.70        | 0.71        |
| P value      | <0.01       | <0.01        | <0.01        | <0.01       | <0.01       |
| Sensitivity  | 62.26       | 36.11        | 50.94        | 61.11       | 66.04       |
| Specificity  | 62.80       | 86.98        | 75.60        | 61.54       | 56.29       |

**Figure S1** Receiver operator characteristic (ROC) curves for PA-based composite indicators in predicting 28-day outcome. CI, confidence interval; AST, aspartate aminotransferase; Crea, serum creatinine; PA, prealbumin; RBP, retinol binding protein; TRF, transferrin.
